# Supplementary material for: Differences in Neuropsychiatric Features in Black and White Individuals Diagnosed with Frontotemporal Degeneration
Source: bioRxiv or medRxiv preprint supplement (doi:10.1101/2023.01.27.23284692), 2023-01-28
Supplement: Supplementary file [file media-1.pdf]

Supplementary Table 1: Functional Assessment Scale (FAS) Items in FTD

|                  | White<br>(N = 1669) | Black<br>(N = 41) | <i>Odds Ratios<br/>for Black</i> | <i>CI</i>   | <i>p</i>    |
|------------------|---------------------|-------------------|----------------------------------|-------------|-------------|
| BILLS (%)        | 893 (53.5)          | 27 (65.9)         | 1.6                              | 0.83 – 3.19 | .17         |
| TAXES (%)        | 971 (58.2)          | 33 (80.5)         | 2.8                              | 1.33 – 6.61 | <b>.01</b>  |
| SHOPPING (%)     | 589 (35.3)          | 21 (51.2)         | 1.81                             | 0.95 – 3.45 | .07         |
| GAMES (%)        | 473 (28.3)          | 15 (36.6)         | 1.39                             | 0.71 – 2.66 | .32         |
| STOVE (%)        | 432 (25.9)          | 18 (43.9)         | 2.19                             | 1.13 – 4.16 | <b>.02</b>  |
| MEALPREP (%)     | 623 (37.3)          | 23 (56.1)         | 2.13                             | 1.13 – 4.07 | <b>.02</b>  |
| EVENTS (%)       | 426 (25.5)          | 22 (53.7)         | 3.09                             | 1.63 – 5.90 | <b>.001</b> |
| PAY ATTN (%)     | 324 (19.4)          | 15 (36.6)         | 2.32                             | 1.17 – 4.45 | <b>.01</b>  |
| REM DATES<br>(%) | 525 (31.5)          | 22 (53.7)         | 2.41                             | 1.27 – 4.60 | <b>.01</b>  |
| TRAVEL (%)       | 801 (48.0)          | 30 (73.2)         | 2.68                             | 1.35 – 5.70 | <b>.01</b>  |

\*Statistical models were adjusted for age, sex, education, and disease duration.
